# Supplementary material for: Light Response and Switching Behavior of Graphene Oxide Membranes Modified with Azobenzene Compounds
Source: MDPI journal article supplement (doi:10.3390/membranes12111131), 2022-11-11
Supplement: s1 [file s1]

# **Light-Response and Switching Behavior of Graphene Oxide Membranes Modified with Azobenzene Compounds**

**Ilia Sadilov <sup>1</sup>, Dmitrii Petukhov <sup>2</sup>, Victor Brotsman <sup>2</sup>, Alexandra Chumakova <sup>3</sup>, Artem Eliseev <sup>2</sup>  
and Andrei Eliseev <sup>1,2,\*</sup>**

<sup>1</sup> Department of Materials Science, Lomonosov Moscow State University, 1-73 Leninskiye Gory, 119991 Moscow, Russia

<sup>2</sup> Department of Chemistry, Lomonosov Moscow State University, 1-3 Leninskiye Gory, 119991 Moscow, Russia

<sup>3</sup> European Synchrotron Radiation Facility, 71 Av. des Martyrs, F-38042 Grenoble, France

\* Correspondence: author: eliseev@inorg.chem.msu.ru; Tel.: +7-(916)-954-60-41

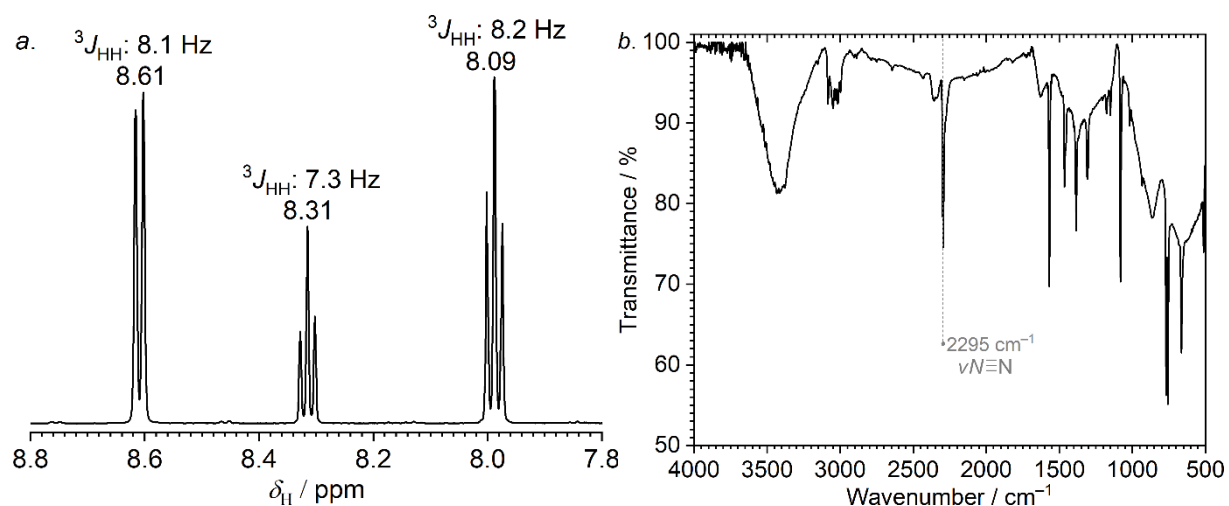

**Figure S1.**  $^1\text{H}$  NMR spectrum (a) and FT-IR spectrum (b) of benzenediazonium chloride.

**Benzenediazonium chloride.**  $^1\text{H}$  NMR (600 MHz,  $\text{D}_2\text{O}$ , ppm):  $\delta_{\text{H}}$  8.61 (d,  $^3J_{\text{HH}}$  8.1 Hz, 2H), 8.31 (t,  $^3J_{\text{HH}}$  7.3 Hz, 1H), 8.09 (t,  $^3J_{\text{HH}}$  8.2 Hz, 2H).

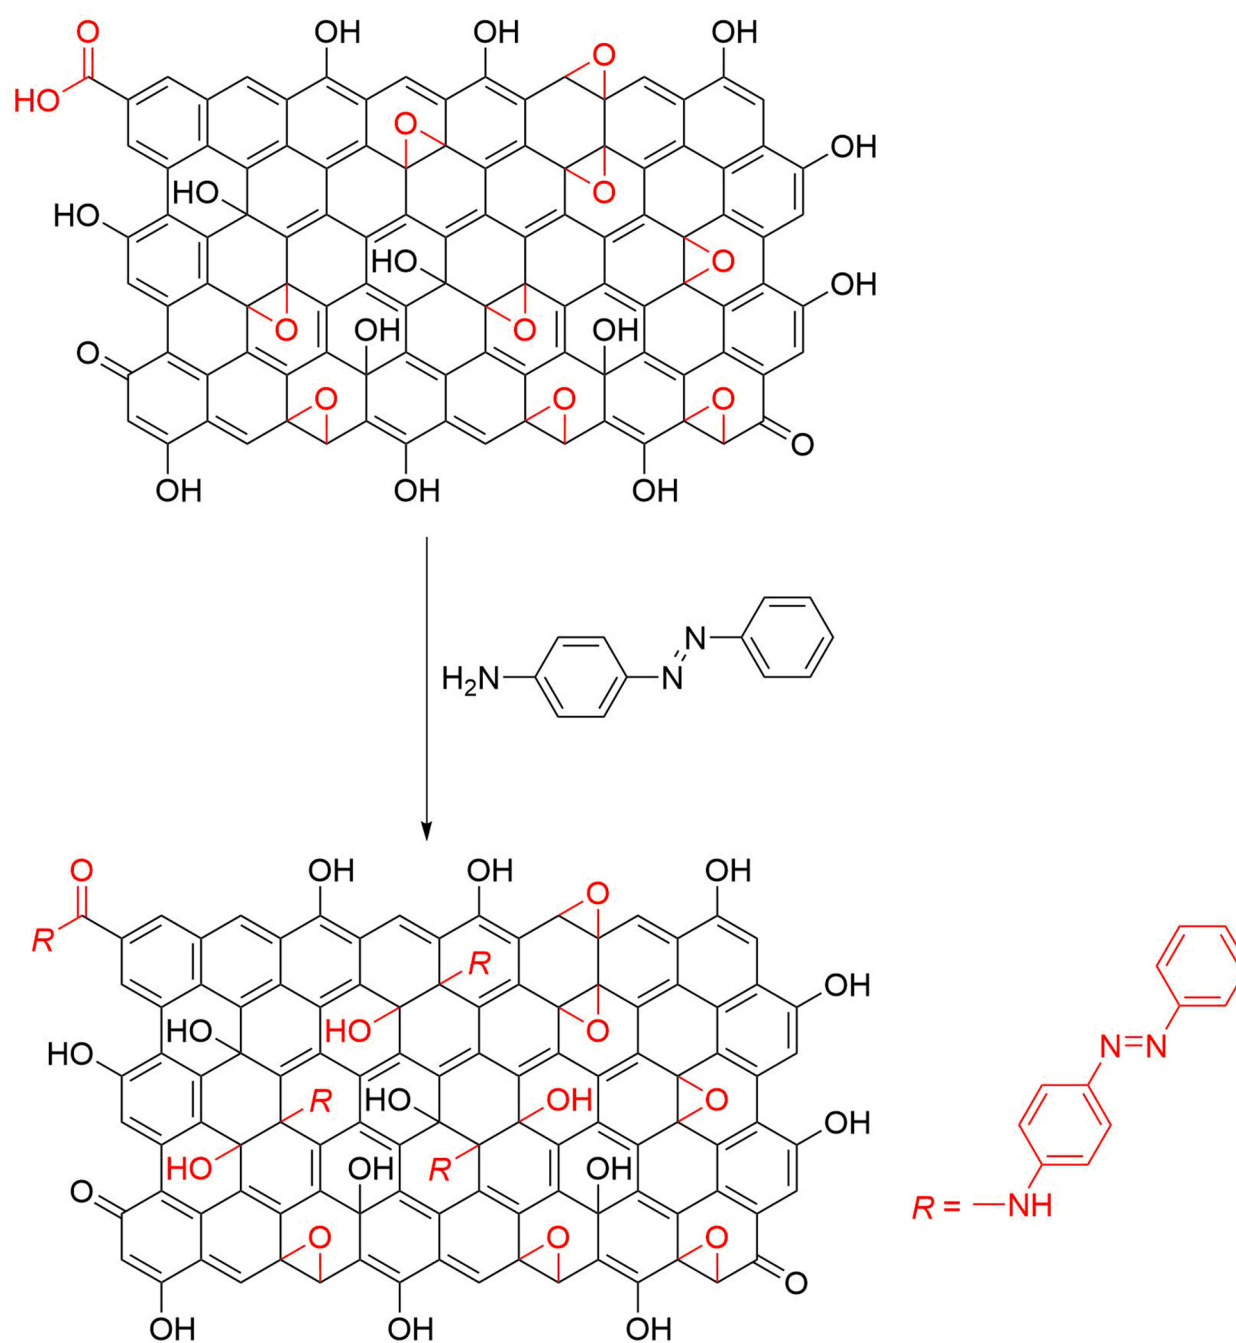

**Figure S2.** Reaction scheme of grafting pathways of *para*-aminoazobenzene onto GO nanoflakes.

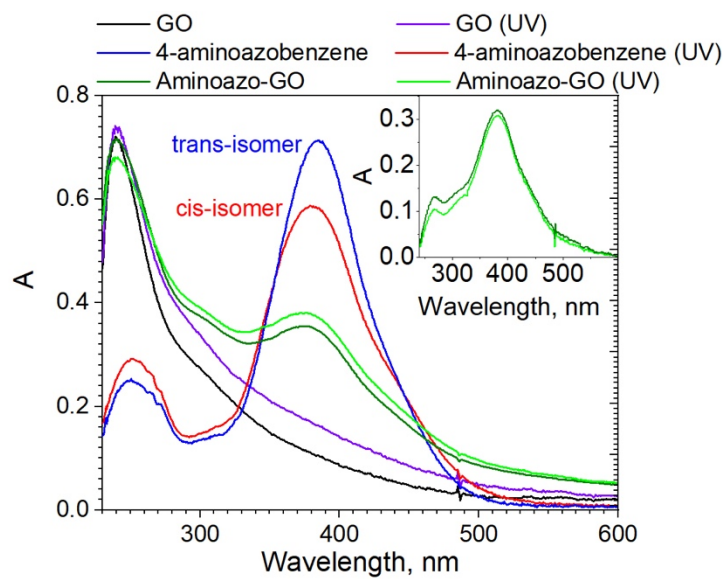

**Figure S3.** UV-vis optical absorption spectra of 4-aminoazobenzene, graphene oxide, aminoazo-GO prior and after UV exposure (325 nm, 10 mW) for 20 min. Inset graph shows difference spectra between aminoazo-GO and GO.

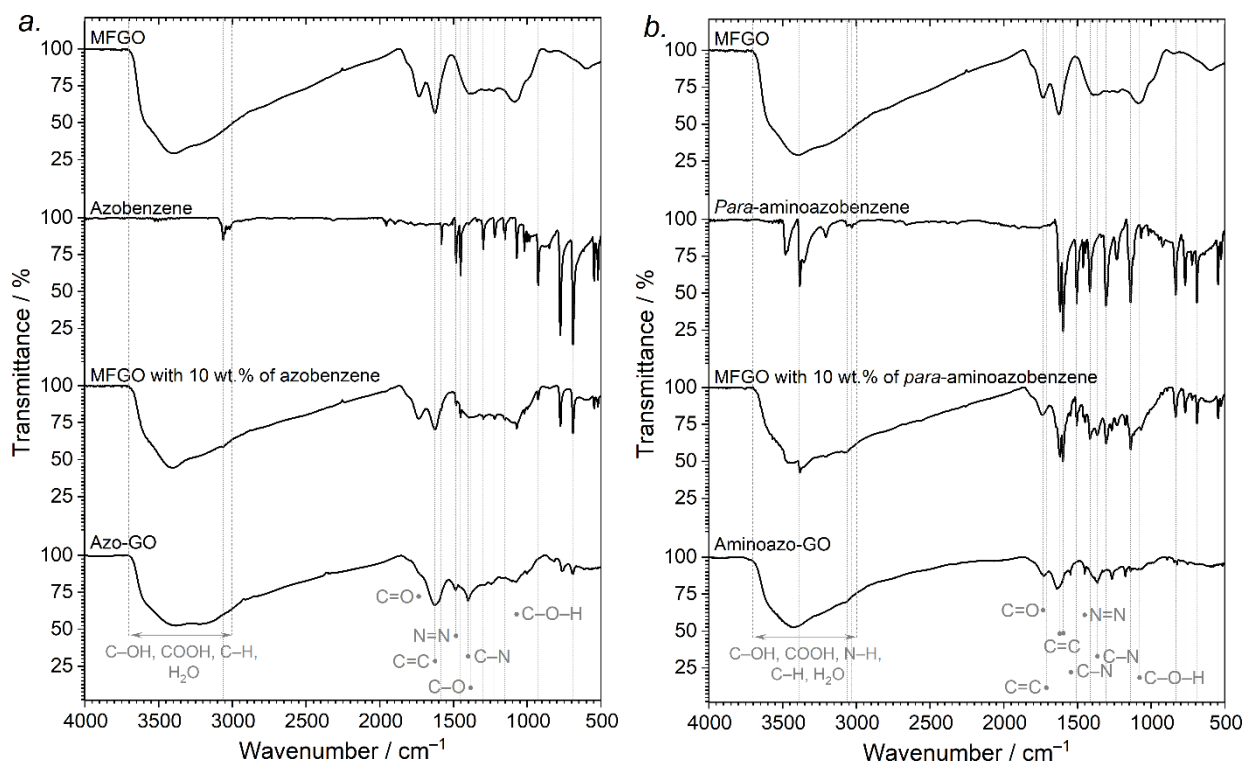

**Figure S4.** (a) FT-IR (KBr) spectra of azo-GO and (b) aminoazo-GO membranes in comparison with initial graphene oxide, initial azobenzene compounds and their control physical mixtures. The spectra reveal both shifting and broadening of azobenzene components signals in the membranes.

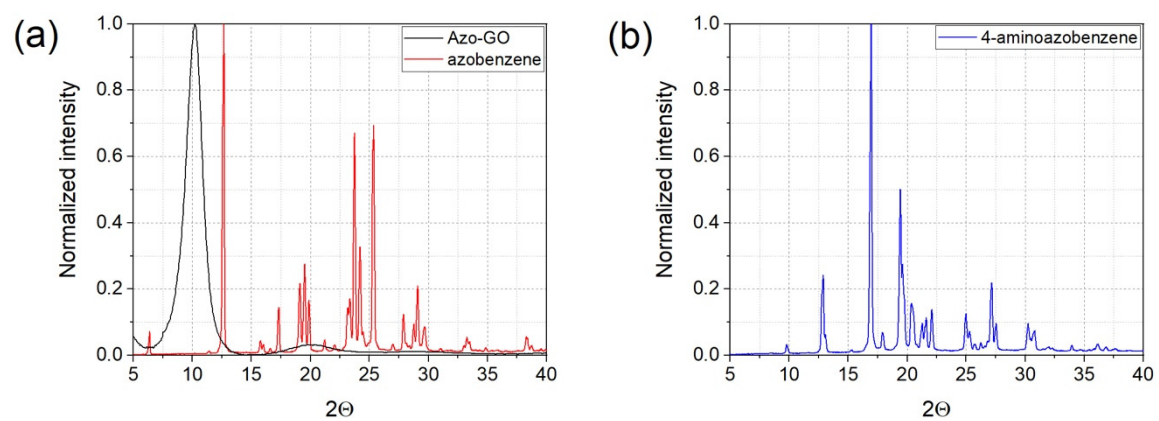

**Figure S5.** X-ray diffraction spectra of azobenzene (a) and 4-aminoazobenzene (b).

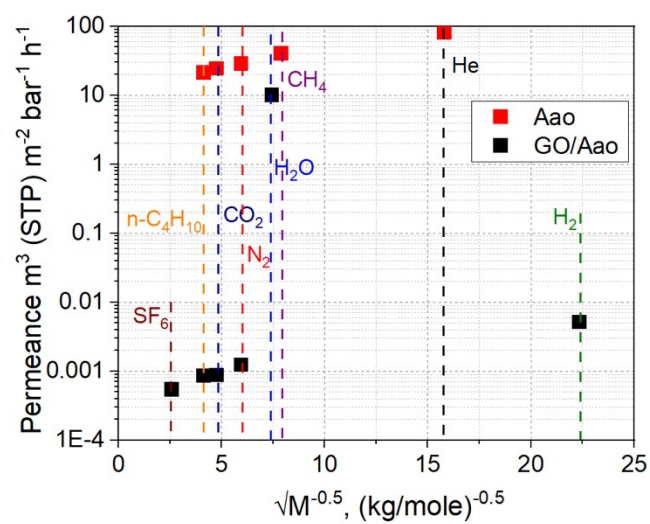

**Figure S6.** Gas permeance for initial anodic alumina membranes and GO/AAo composite membranes.

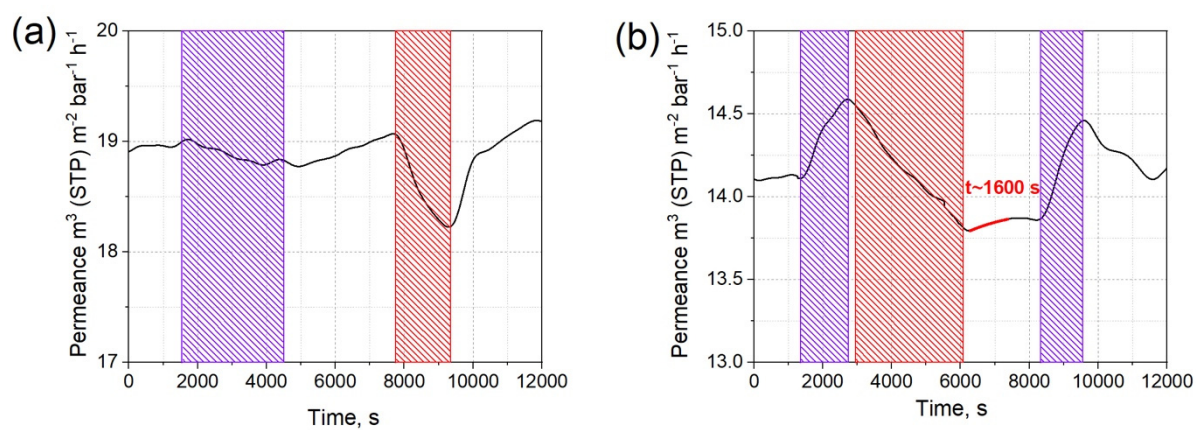

**Figure S7.** Variation of water vapor permeance for GO (a) and aminoazo-GO (b) under UV and IR irradiation.



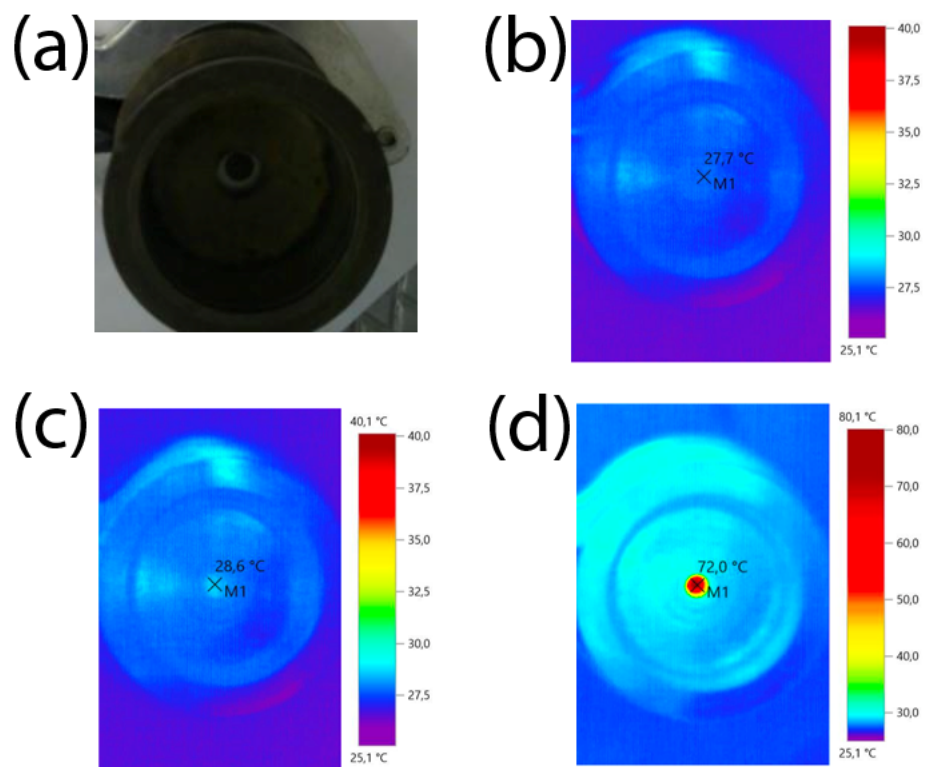

**Figure S8.** (a–d) Bottom-side IR- thermography maps of GO membrane fixed in the permeation cell, recorded under UV- and IR illumination of membranes. Point is the temperature of central point of the membrane.

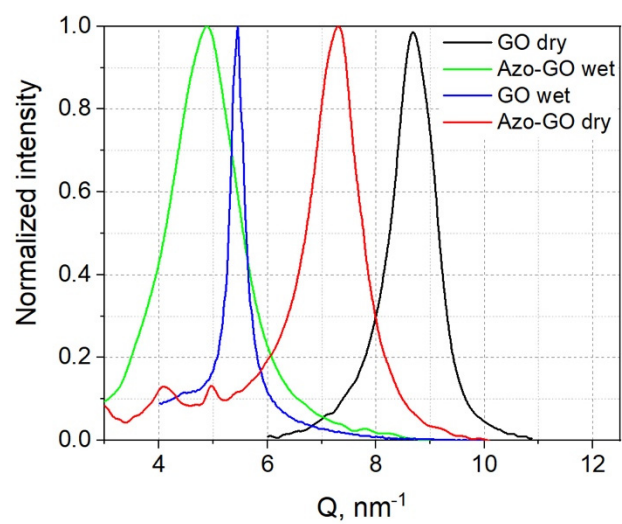

**Figure S9.** Comparison X-ray diffractions for GO and azo-GO in dry and wet states.

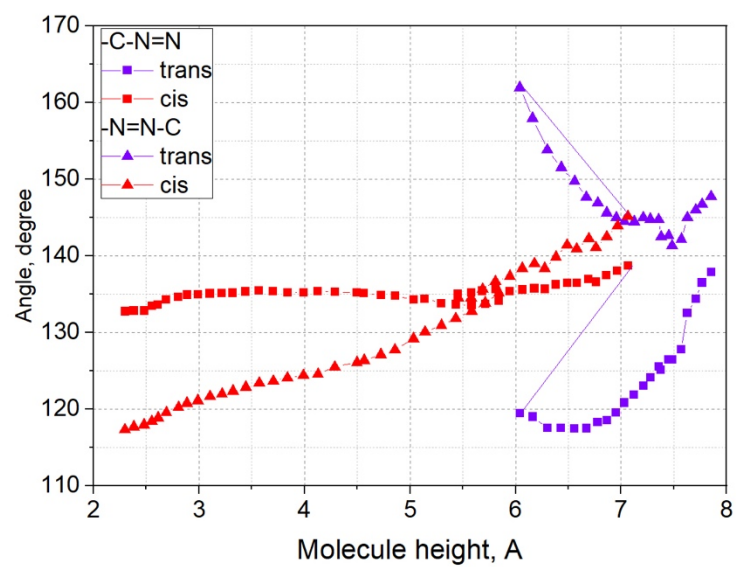

**Figure S10.**  $\text{-C=N=N-}$  and  $\text{-N=N-C-}$  angles for grafted azobenzene fragment into graphene oxide nanoflake.
